# Supplementary material
Source: PubMed Central journal article supplement (PMC4516664)
Supplement: NIHMS685764-supplement-01.pdf [file NIHMS685764-supplement-01.pdf]

Supplemental Table 1. NASH CRN feature scoring system definitions.

| Item                                  | Definition                           | Score/Code |
|---------------------------------------|--------------------------------------|------------|
| <b>Steatosis, grade</b>               |                                      |            |
|                                       | <5%                                  | 0          |
|                                       | 5-33%                                | 1          |
|                                       | 33-66%                               | 2          |
|                                       | >66%                                 | 3          |
| <b>Inflammation, grade</b>            |                                      |            |
| Lobular inflammation                  | No foci                              | 0          |
|                                       | <2 foci per 200x field               | 1          |
|                                       | 2-4 foci per 200x field              | 2          |
|                                       | >4 foci per 200x field               | 3          |
| Portal inflammation                   | None                                 | 0          |
|                                       | Mild                                 | 1          |
|                                       | More than Mild                       | 2          |
| <b>Ballooning degeneration, grade</b> |                                      |            |
|                                       | None                                 | 0          |
|                                       | Few balloon cells                    | 1          |
|                                       | Many cells/prominent ballooning      | 2          |
| <b>Fibrosis, stage</b>                |                                      |            |
|                                       | None                                 | 0          |
|                                       | Mild, zone 3, perisinusoidal         | 1A         |
|                                       | Moderate, zone 3, perisinusoidal     | 1B         |
|                                       | Portal/periportal                    | 1C         |
|                                       | Perisinusoidal and portal/periportal | 2          |
|                                       | Bridging fibrosis                    | 3          |
|                                       | Cirrhosis                            | 4          |
| <b>NASH category</b>                  |                                      |            |
|                                       | Not Steatohepatitis                  | 0          |
|                                       | Borderline, Zone 3 pattern           | 1A         |
|                                       | Borderline, Zone 1 pattern           | 1B         |
|                                       | Definite Steatohepatitis             | 2          |

Supplemental Table 2. Univariate unadjusted hazard ratios and 95% CI's of outcome mortality/liver transplantation

|                                    | Hazard Ratio  | 95% CI of HR | P value |
|------------------------------------|---------------|--------------|---------|
| <b>Steatosis, grade</b>            |               |              |         |
| 1                                  | 1 (reference) |              |         |
| 2                                  | 0.84          | 0.60, 1.8    | 0.324   |
| 3                                  | 0.91          | 0.64, 1.3    | 0.616   |
| <b>Lobular inflammation, grade</b> |               |              |         |
| 0                                  | 1 (reference) |              |         |
| 1                                  | 0.71          | 0.39, 1.33   | 0.288   |
| 2                                  | 0.93          | 0.47, 1.83   | 0.837   |
| 3                                  | 0.85          | 0.40, 1.82   | 0.681   |
| <b>Portal inflammation, grade</b>  |               |              |         |
| 0                                  | 1 (reference) |              |         |
| 1                                  | 1.16          | 0.80, 1.66   | 0.434   |
| 2                                  | 2.65          | 1.72, 4.09   | <0.001  |
| <b>Ballooning, grade</b>           |               |              |         |
| 0                                  | 1 (reference) |              |         |
| 1                                  | 1.42          | 1.01, 2.00   | 0.043   |
| 2                                  | 2.40          | 1.62, 3.55   | <0.001  |
| <b>NAS category</b>                |               |              |         |
| 1-2                                | 1 (reference) |              |         |
| 3-4                                | 1.18          | 0.84, 1.66   | 0.338   |
| 5-8                                | 1.40          | 0.98, 2.01   | 0.070   |
| <b>NASH category</b>               |               |              |         |
| Non-NASH                           | 1 (reference) |              |         |
| Borderline/suspicious              | 1.92          | 1.32, 2.79   | 0.001   |
| Definitive NASH                    | 2.29          | 1.65, 3.19   | <0.001  |
| <b>Fibrosis stage</b>              |               |              |         |
| 0                                  | 1 (reference) |              |         |
| 1                                  | 1.88          | 1.28, 2.76   | 0.001   |
| 2                                  | 2.89          | 1.93, 4.33   | <0.001  |
| 3                                  | 3.76          | 2.40, 5.89   | <0.001  |
| 4                                  | 10.90         | 6.06, 19.62  | <0.001  |

**Supplemental Table 3. Univariate unadjusted hazard ratios and 95% CI's of outcome liver-related events**

|                                    | <b>Hazard Ratio</b> | <b>95% CI of HR</b> | <b>P value</b> |
|------------------------------------|---------------------|---------------------|----------------|
| <b>Steatosis, grade</b>            |                     |                     |                |
| 1                                  | 1 (reference)       |                     |                |
| 2                                  | 0.68                | 0.26, 1.82          | 0.447          |
| 3                                  | 1.27                | 0.52, 3.11          | 0.600          |
| <b>Lobular inflammation, grade</b> |                     |                     |                |
| 0                                  | 1 (reference)       |                     |                |
| 1                                  | 0.71                | 0.39, 1.33          | 0.288          |
| 2                                  | 0.93                | 0.47, 1.83          | 0.837          |
| 3                                  | 0.85                | 0.40, 1.82          | 0.681          |
| <b>Portal inflammation, grade</b>  |                     |                     |                |
| 0                                  | 1 (reference)       |                     |                |
| 1                                  | 1.78                | 0.51, 6.25          | 0.368          |
| 2                                  | 8.24                | 2.26, 30.00         | 0.001          |
| <b>Ballooning, grade</b>           |                     |                     |                |
| 0                                  | 1 (reference)       |                     |                |
| 1                                  | 2.36                | 0.93, 5.98          | 0.072          |
| 2                                  | 5.77                | 2.25, 14.76         | <0.001         |
| <b>NAS category</b>                |                     |                     |                |
| 1-2                                | 1 (reference)       |                     |                |
| 3-4                                | 1.44                | 0.51, 4.06          | 0.486          |
| 5-8                                | 2.70                | 0.99, 7.31          | 0.051          |
| <b>NASH category</b>               |                     |                     |                |
| Non-NASH                           | 1 (reference)       |                     |                |
| Borderline/suspicious              | 6.37                | 1.86, 21.78         | 0.003          |
| Definitive NASH                    | 10.16               | 3.34, 30.93         | <0.001         |
| <b>Fibrosis stage</b>              |                     |                     |                |
| 0                                  | 1 (reference)       |                     |                |
| 1                                  | 2.31                | 0.62, 8.66          | 0.213          |
| 2                                  | 6.68                | 2.02, 22.06         | 0.002          |
| 3                                  | 13.42               | 4.23, 42.55         | <0.001         |
| 4                                  | 52.89               | 13.31, 210.15       | <0.001         |

**Supplemental Table 4. Cumulative probability (unadjusted) of outcomes by liver biopsy category in patients with early (fibrosis stage 0-2) disease**

| Liver Biopsy Features              | Mortality/liver transplantation<br>(n = 548) |                                           |         | Liver-related events<br>(n = 547) |                                           |         |
|------------------------------------|----------------------------------------------|-------------------------------------------|---------|-----------------------------------|-------------------------------------------|---------|
|                                    | Events<br>(n)                                | Unadjusted cumulative<br>(%) <sup>a</sup> | P value | Events<br>(n)                     | Unadjusted cumulative<br>(%) <sup>a</sup> | P value |
| <b>Steatosis, grade</b>            |                                              |                                           | 0.722   |                                   |                                           | 0.093   |
| 1                                  | 71/236                                       | 30.1                                      |         | 5/236                             | 2.1                                       |         |
| 2                                  | 42/178                                       | 23.6                                      |         | 3/177                             | 1.7                                       |         |
| 3                                  | 39/134                                       | 29.1                                      |         | 7/134                             | 5.2                                       |         |
| <b>Lobular inflammation, grade</b> |                                              |                                           | 0.522   |                                   |                                           | 0.526   |
| 0                                  | 10/30                                        | 33.3                                      |         | 0/30                              | 0                                         |         |
| 1                                  | 109/392                                      | 27.8                                      |         | 11/391                            | 2.8                                       |         |
| 2                                  | 27/92                                        | 29.3                                      |         | 4/92                              | 4.3                                       |         |
| 3                                  | 6/34                                         | 17.6                                      |         | 0/34                              | 0                                         |         |
| <b>Portal inflammation, grade</b>  |                                              |                                           | 0.367   |                                   |                                           | 0.590   |
| 0                                  | 40/157                                       | 25.5                                      |         | 3/156                             | 1.9                                       |         |
| 1                                  | 95/343                                       | 27.7                                      |         | 10/343                            | 2.9                                       |         |
| 2                                  | 17/48                                        | 35.4                                      |         | 2/48                              | 4.2                                       |         |
| <b>Ballooning, grade</b>           |                                              |                                           | 0.050   |                                   |                                           | 0.162   |
| 0                                  | 102/378                                      | 28.3                                      |         | 8/377                             | 2.1                                       |         |
| 1                                  | 36/129                                       | 32.7                                      |         | 5/129                             | 3.9                                       |         |
| 2                                  | 14/41                                        | 42.5                                      |         | 2/41                              | 4.9                                       |         |
| <b>NAS category</b>                |                                              |                                           | 0.730   |                                   |                                           | 0.461   |
| 1-2                                | 58/201                                       | 28.9                                      |         | 5/201                             | 2.5                                       |         |
| 3-4                                | 59/223                                       | 26.5                                      |         | 5/222                             | 2.2                                       |         |
| 5-8                                | 35/124                                       | 28.2                                      |         | 5/124                             | 4.0                                       |         |
| <b>NASH category</b>               |                                              |                                           | 0.009   |                                   |                                           | 0.004   |
| Non-NASH                           | 84/333                                       | 25.2                                      |         | 4/332                             | 1.2                                       |         |
| Borderline/suspicious              | 33/93                                        | 35.5                                      |         | 5/93                              | 5.4                                       |         |
| Definitive NASH                    | 35/122                                       | 28.7                                      |         | 6/122                             | 4.9                                       |         |
| <b>Fibrosis stage</b>              |                                              |                                           | <0.001  |                                   |                                           | 0.001   |
| 0                                  | 74/322                                       | 23.0                                      |         | 5/321                             | 1.6                                       |         |
| 1                                  | 42/141                                       | 29.8                                      |         | 4/141                             | 2.8                                       |         |
| 2                                  | 36/85                                        | 42.3                                      |         | 6/85                              | 7.1                                       |         |

FOOTNOTE: <sup>a</sup> Estimated using Kaplan–Meier analysis

**Supplemental Table 5. Multivariate-adjusted hazard ratios and 95% CI's of outcome mortality/liver transplantation in patients with early (stage 0-2) disease**

|                   | <b>Hazard Ratio</b> | <b>95% CI of HR</b> | <b>P value</b> |
|-------------------|---------------------|---------------------|----------------|
| <b>Model 1</b>    |                     |                     |                |
| Fibrosis, stage 0 | 1 (reference)       |                     |                |
| Fibrosis, stage 1 | 2.04                | 1.38, 3.02          | <0.001         |
| Fibrosis, stage 2 | 3.10                | 2.05, 4.68          | <0.001         |
| <b>Model 2</b>    |                     |                     |                |
| Fibrosis, stage 0 | 1 (reference)       |                     |                |
| Fibrosis, stage 1 | 1.85                | 1.19, 2.89          | 0.007          |
| Fibrosis, stage 2 | 2.17                | 1.34, 3.51          | 0.002          |
| Age (years)       | 1.07                | 1.05, 1.08          | <0.001         |
| Diabetes (yes)    | 1.95                | 1.25, 3.03          | 0.003          |
| Smoking, Never    | 1 (reference)       |                     |                |
| Former            | 1.42                | 0.83, 2.44          | 0.203          |
| Current           | 2.20                | 1.32, 3.67          | 0.002          |
| Statins use (yes) | 0.28                | 0.11, 0.72          | 0.008          |

**FOOTNOTE**

Model 1 includes the liver biopsy features statistically significant by univariate analysis (supplemental table 4) plus calendar year of liver biopsy and liver biopsy size.

Model 2 includes variables from model 1 plus age, gender, race, BMI, diabetes, hypertension, statins use, site, smoking.

Supplemental Table 6. Cumulative probability (unadjusted) of outcomes by NASH category and fibrosis stage

| NASH category                        | Mortality/liver transplantation<br>(n = 619) |                                           |         | Liver-related events<br>(n = 615) |                                           |         |
|--------------------------------------|----------------------------------------------|-------------------------------------------|---------|-----------------------------------|-------------------------------------------|---------|
|                                      | Events<br>(n)                                | Unadjusted cumulative<br>(%) <sup>a</sup> | P value | Events<br>(n)                     | Unadjusted cumulative<br>(%) <sup>a</sup> | P value |
| <b>Non-NASH</b>                      |                                              |                                           | <0.001  |                                   |                                           | 0.438   |
| Fibrosis (-)                         | 62/279                                       | 22.2                                      |         | 4/278                             | 1.4                                       |         |
| Fibrosis (+)                         | 23/56                                        | 41.1                                      |         | 0/56                              | 0                                         |         |
| <b>NASH (borderline, definitive)</b> |                                              |                                           | 0.018   |                                   |                                           | 0.070   |
| Fibrosis (-)                         | 12/43                                        | 27.9                                      |         | 1/43                              | 2.3                                       |         |
| Fibrosis (+)                         | 96/241                                       | 39.8                                      |         | 21/238                            | 8.8                                       |         |

FOOTNOTE: <sup>a</sup> Estimated using Kaplan–Meier analysis

## **SUPPLEMENTAL FIGURES LEGEND**

**Figure 1.** Algorithm of patient selection

**Figure 2.** Number of liver biopsies by calendar year (decade)

**Figure 3.** Survival free or liver transplantation based on liver histology features, (A to G)

**Figure 4.** Survival free of liver-related events based on liver histology features, (A to G)

**Supplemental Figure 1**

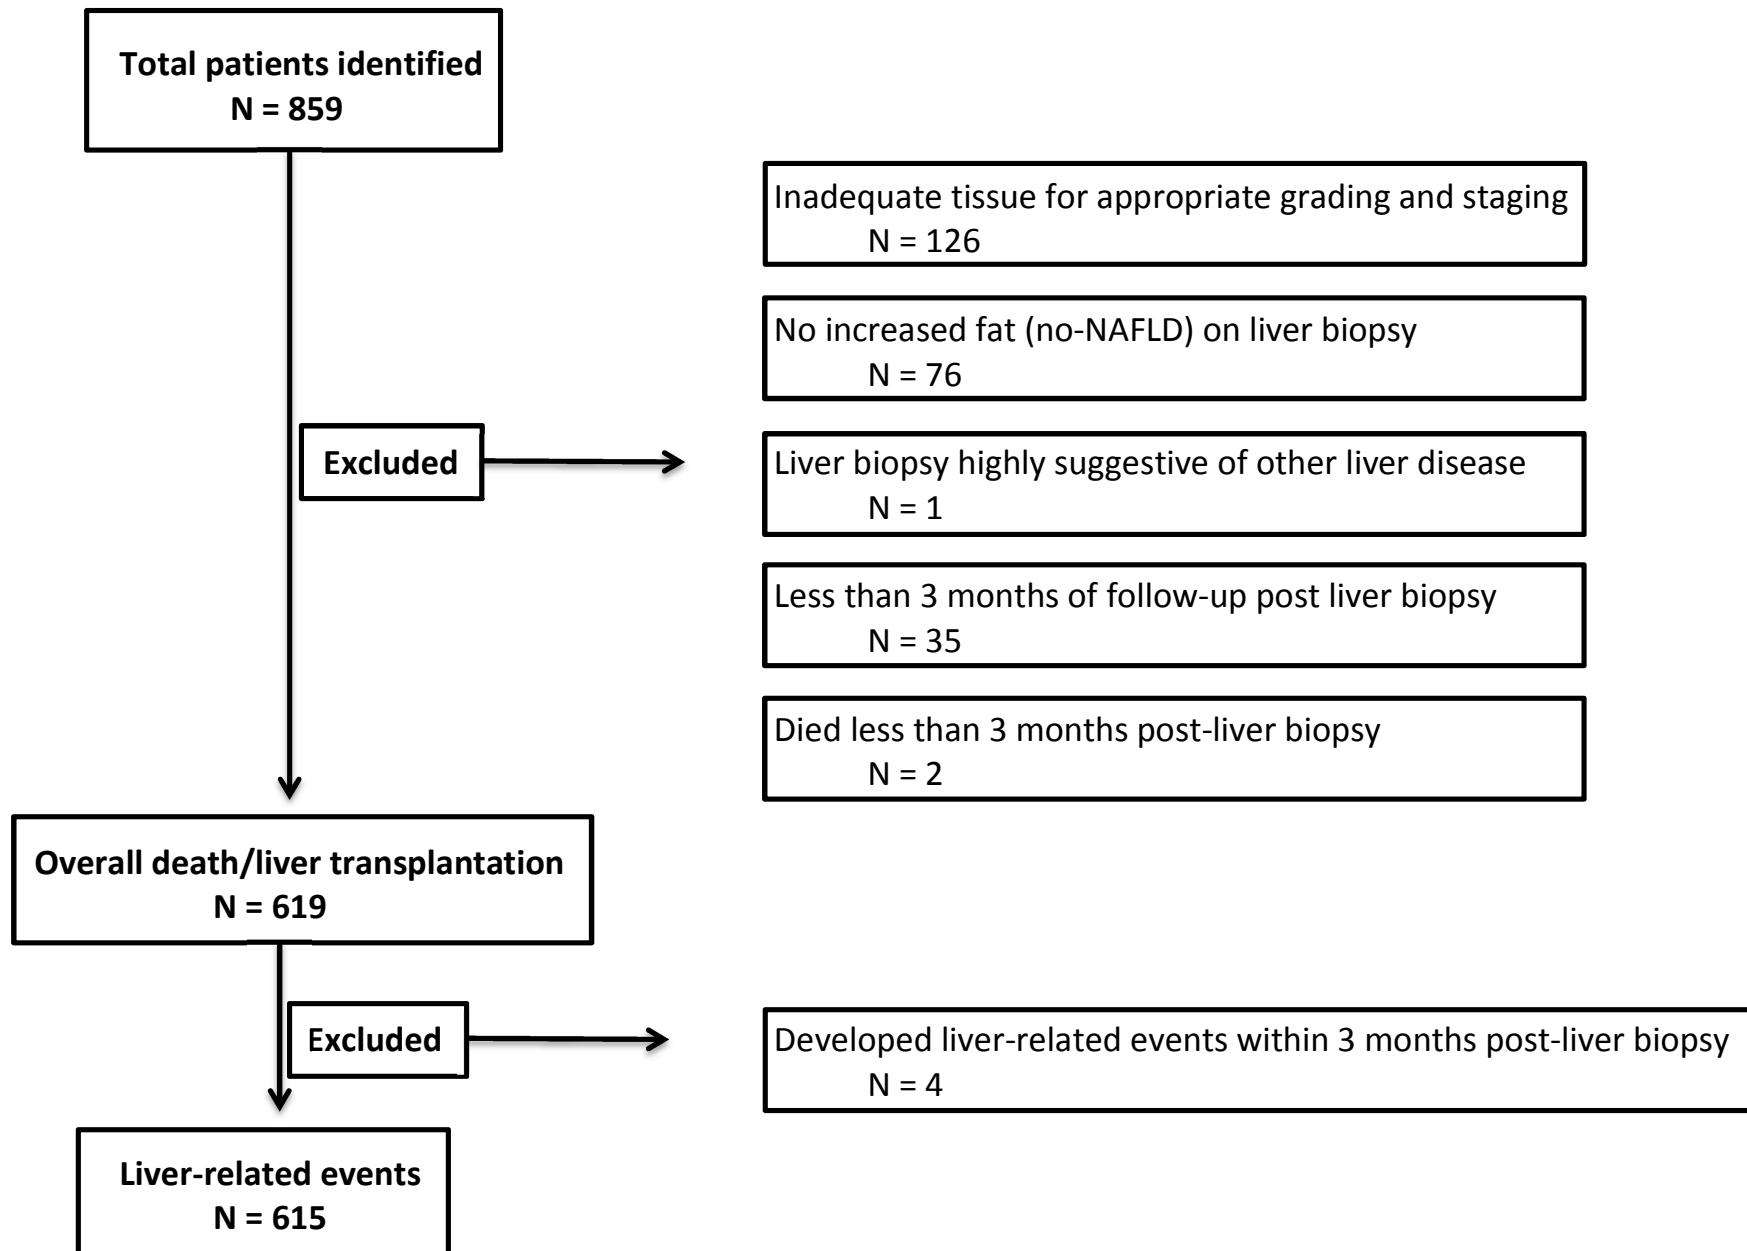



**Supplemental Figure 2**

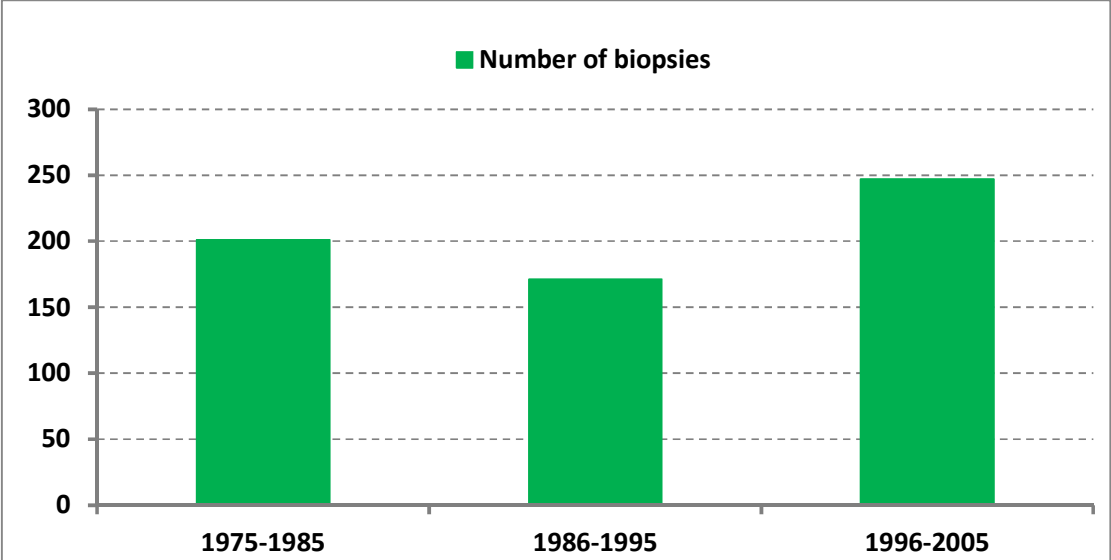

**Supplemental Figure 3A**

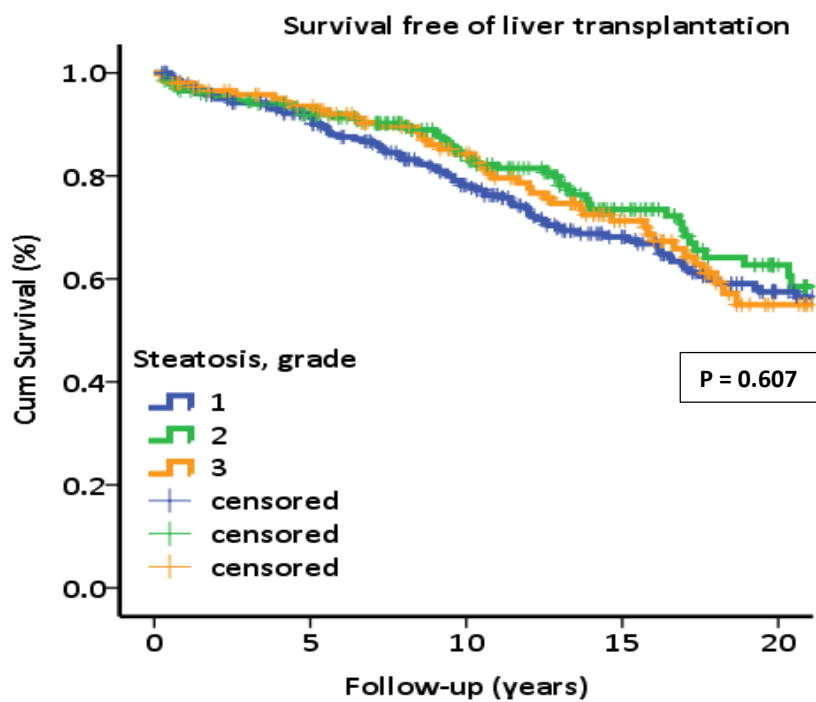

|         |     |     |     |     |    |
|---------|-----|-----|-----|-----|----|
| Grade 1 | 269 | 222 | 166 | 106 | 59 |
| Grade 2 | 204 | 172 | 122 | 68  | 30 |
| Grade 3 | 146 | 124 | 92  | 57  | 19 |

**Supplemental Figure 3B**

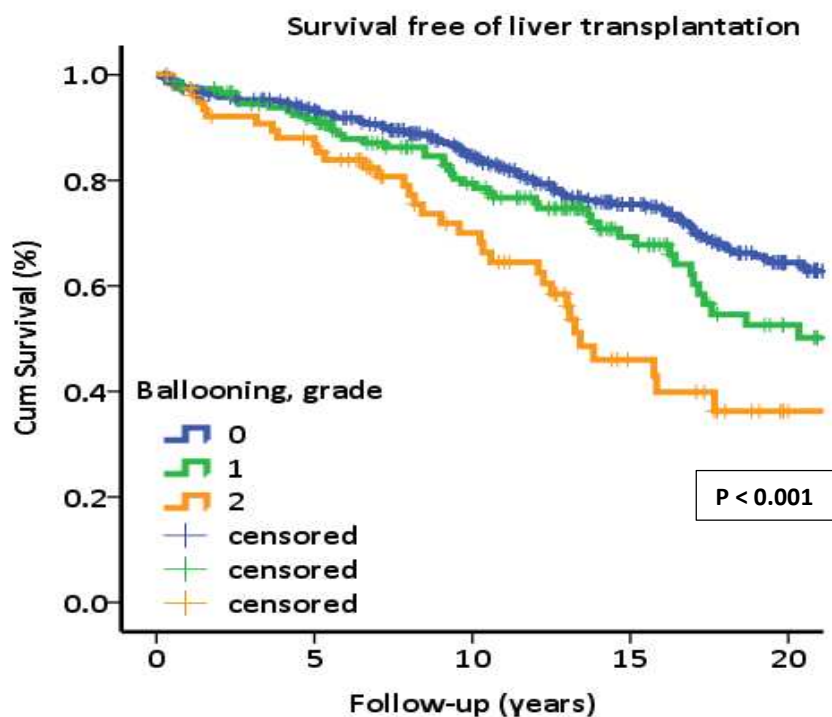

|         |     |     |     |     |    |
|---------|-----|-----|-----|-----|----|
| Grade 0 | 389 | 326 | 253 | 172 | 85 |
| Grade 1 | 150 | 127 | 89  | 46  | 22 |
| Grade 2 | 80  | 64  | 38  | 15  | 2  |

**Supplemental Figure 3C**

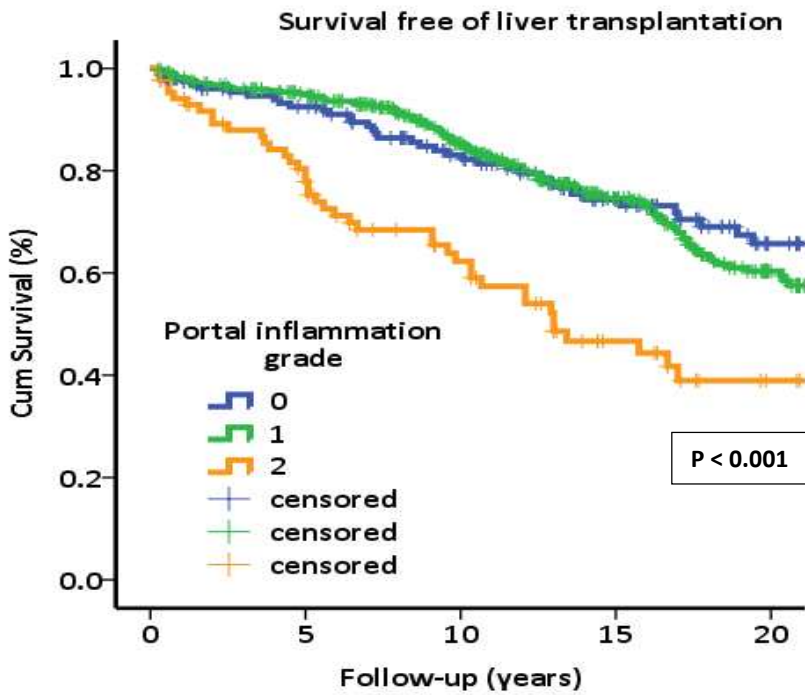

|         |     |     |     |     |    |
|---------|-----|-----|-----|-----|----|
| Grade 0 | 157 | 128 | 97  | 63  | 33 |
| Grade 1 | 376 | 328 | 245 | 150 | 66 |
| Grade 2 | 86  | 62  | 39  | 20  | 9  |

**Supplemental Figure 3D**

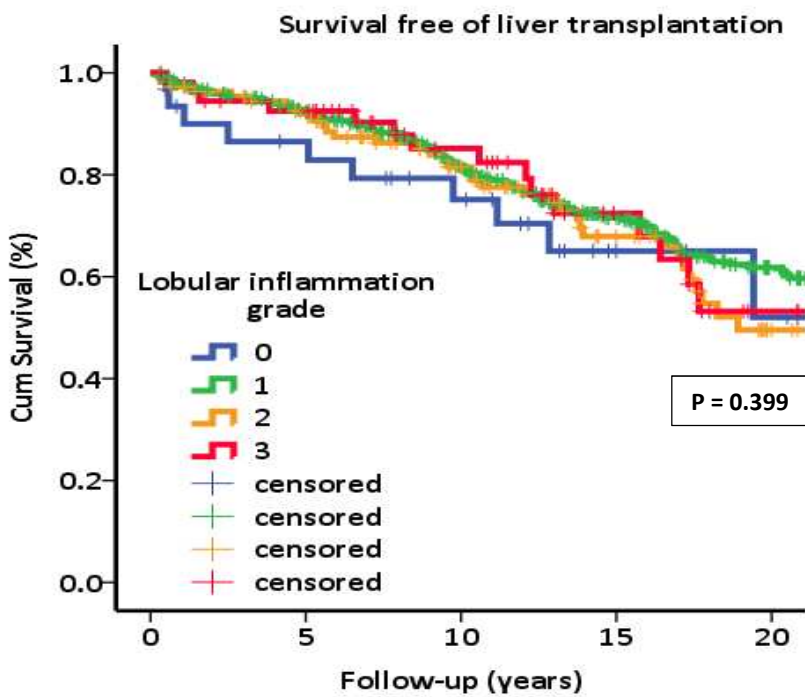

|         |     |     |     |     |    |
|---------|-----|-----|-----|-----|----|
| Grade 0 | 31  | 24  | 18  | 7   | 4  |
| Grade 1 | 423 | 353 | 268 | 173 | 87 |
| Grade 2 | 110 | 94  | 65  | 37  | 12 |
| Grade 3 | 55  | 48  | 31  | 16  | 6  |

**Supplemental Figure 3E**

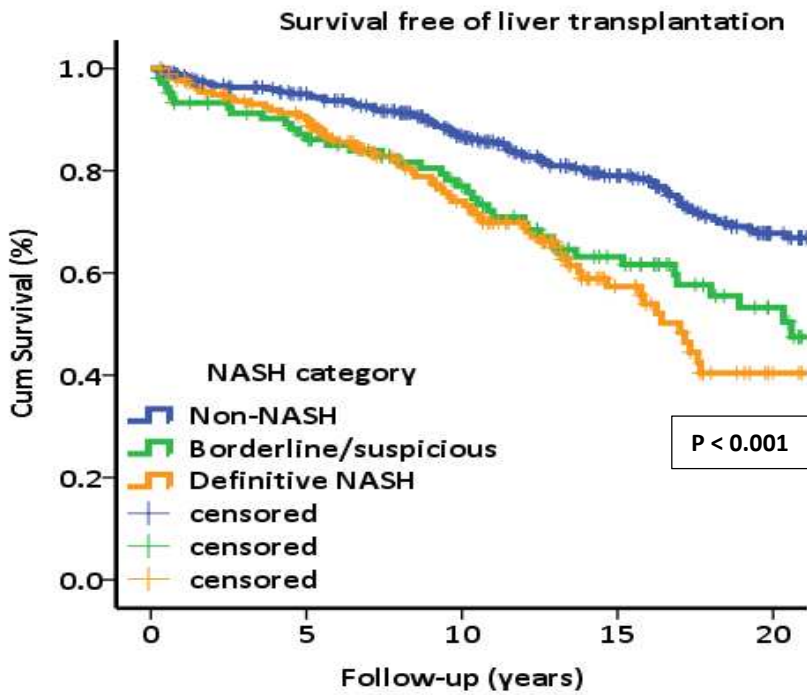

|           |     |     |     |     |    |
|-----------|-----|-----|-----|-----|----|
| Non-NASH  | 335 | 287 | 227 | 156 | 79 |
| Bord/susp | 105 | 84  | 65  | 42  | 19 |
| Def. NASH | 179 | 148 | 90  | 36  | 11 |

**Supplemental Figure 3F**

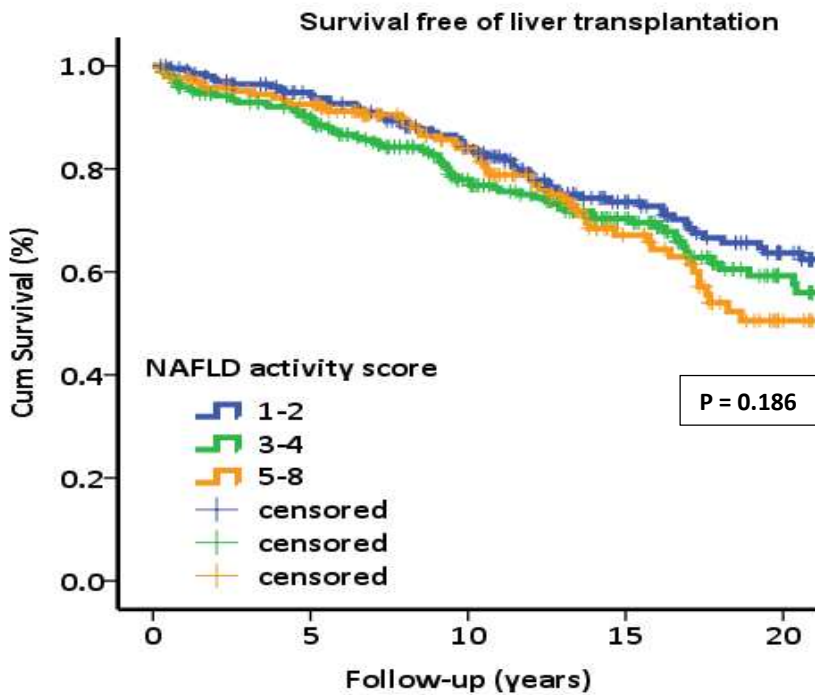

|         |     |     |     |    |    |
|---------|-----|-----|-----|----|----|
| NAS 1-2 | 205 | 174 | 142 | 94 | 53 |
| NAS 3-4 | 247 | 202 | 141 | 89 | 36 |
| NAS 5-8 | 167 | 143 | 99  | 51 | 20 |

**Supplemental Figure 3G**

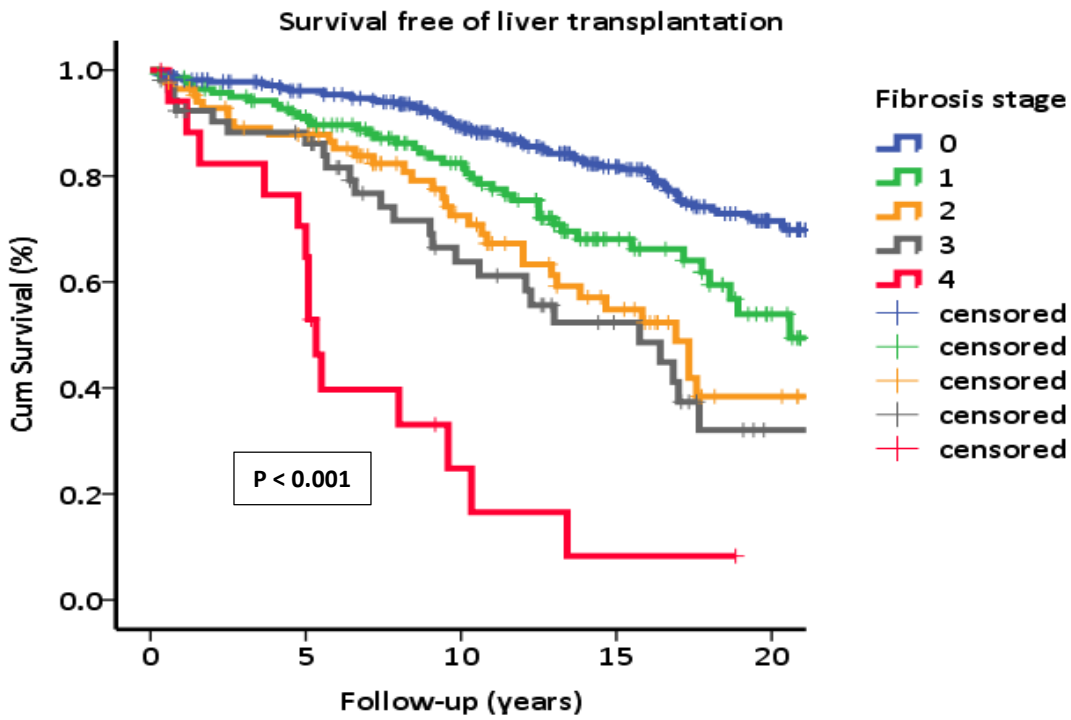

|         |     |     |     |     |    |
|---------|-----|-----|-----|-----|----|
| Stage 0 | 322 | 276 | 228 | 157 | 84 |
| Stage 1 | 141 | 120 | 85  | 38  | 14 |
| Stage 2 | 85  | 69  | 42  | 24  | 8  |
| Stage 3 | 53  | 42  | 24  | 14  | 3  |
| Stage 4 | 18  | 12  | 3   | 1   | 0  |

**Supplemental Figure 4A**

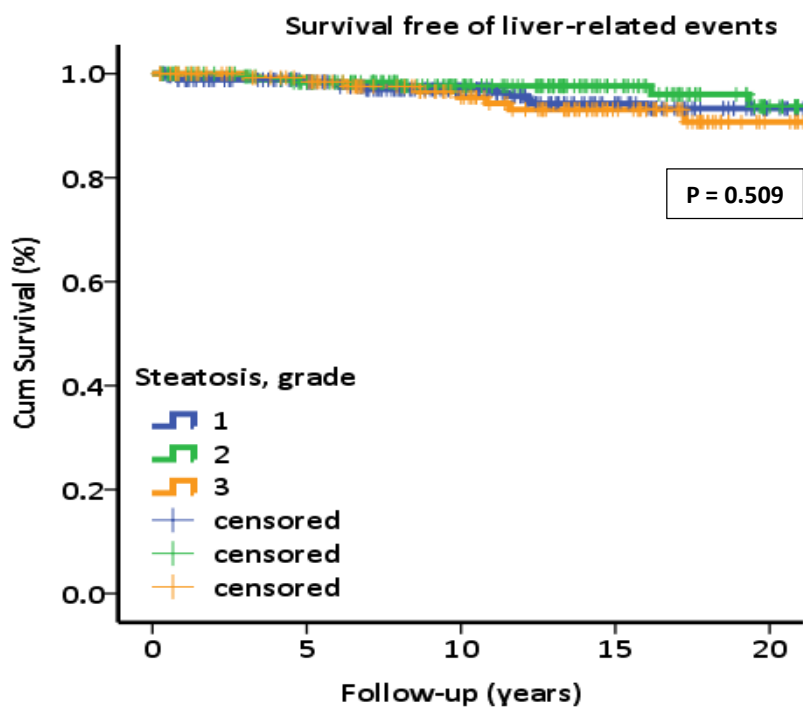

|         |     |     |     |     |    |
|---------|-----|-----|-----|-----|----|
| Grade 1 | 269 | 222 | 167 | 107 | 58 |
| Grade 2 | 202 | 170 | 121 | 69  | 30 |
| Grade 3 | 144 | 122 | 89  | 54  | 19 |

**Supplemental Figure 4B**

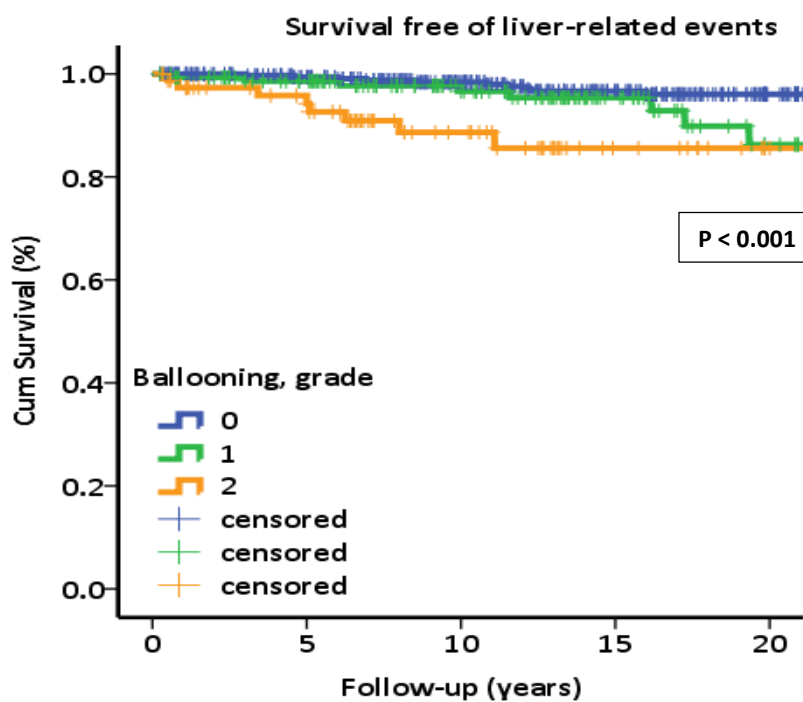

|         |     |     |     |     |    |
|---------|-----|-----|-----|-----|----|
| Grade 0 | 387 | 327 | 254 | 172 | 84 |
| Grade 1 | 150 | 126 | 89  | 46  | 21 |
| Grade 2 | 78  | 61  | 34  | 12  | 2  |

**Supplemental Figure 4C**

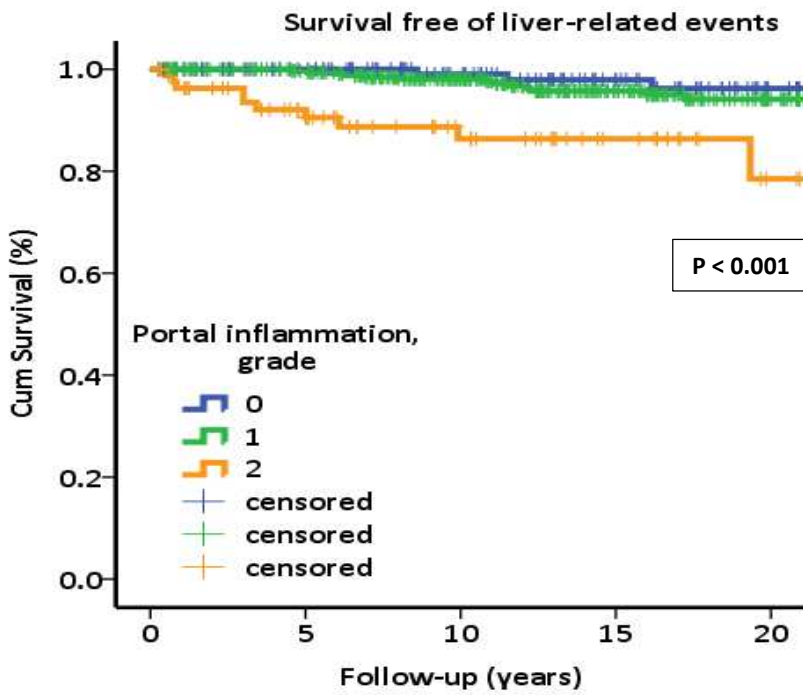

|         |     |     |     |     |    |
|---------|-----|-----|-----|-----|----|
| Grade 0 | 156 | 128 | 97  | 64  | 33 |
| Grade 1 | 374 | 326 | 243 | 146 | 66 |
| Grade 2 | 85  | 60  | 37  | 20  | 8  |

**Supplemental Figure 4D**

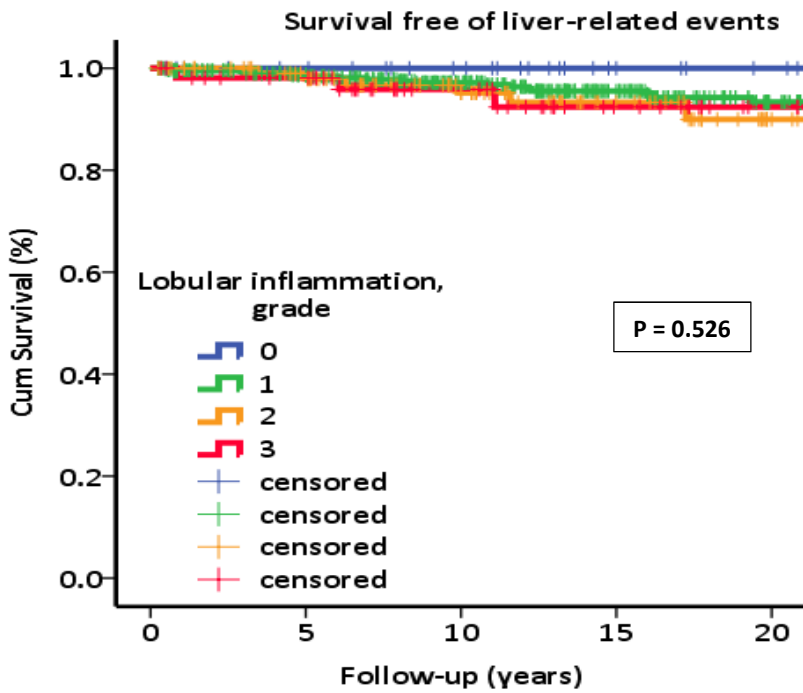

|         |     |     |     |     |    |
|---------|-----|-----|-----|-----|----|
| Grade 0 | 30  | 24  | 18  | 8   | 4  |
| Grade 1 | 421 | 350 | 266 | 170 | 85 |
| Grade 2 | 109 | 92  | 62  | 36  | 12 |
| Grade 3 | 55  | 48  | 31  | 16  | 6  |

**Supplemental Figure 4E**

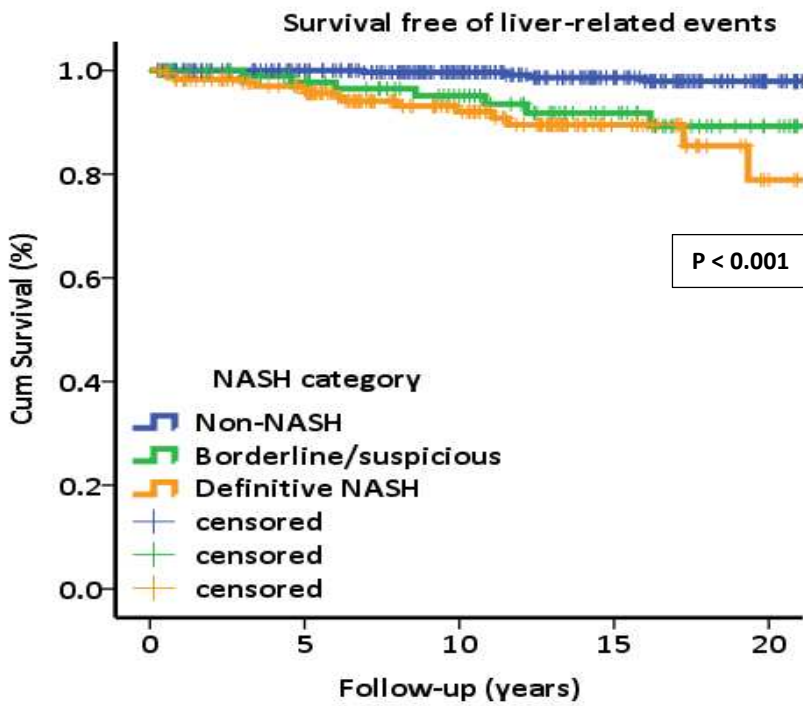

|           |     |     |     |     |    |
|-----------|-----|-----|-----|-----|----|
| Non-NASH  | 334 | 287 | 227 | 156 | 79 |
| Bord/susp | 104 | 83  | 65  | 41  | 18 |
| Def. NASH | 177 | 144 | 85  | 33  | 10 |

**Supplemental Figure 4F**

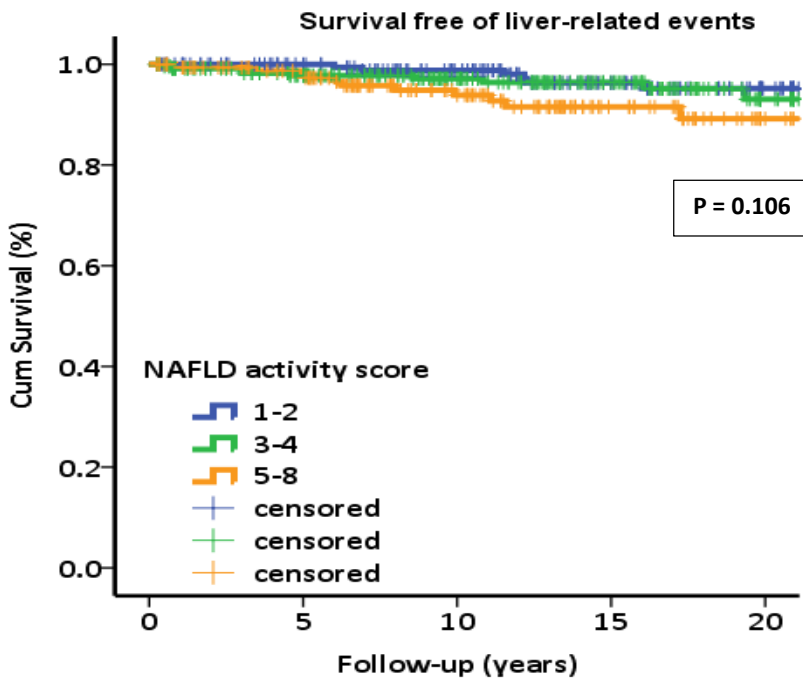

|         |     |     |     |    |    |
|---------|-----|-----|-----|----|----|
| NAS 1-2 | 205 | 174 | 142 | 93 | 52 |
| NAS 3-4 | 245 | 200 | 141 | 89 | 35 |
| NAS 5-8 | 165 | 140 | 94  | 48 | 20 |



**Supplemental Figure 4G**

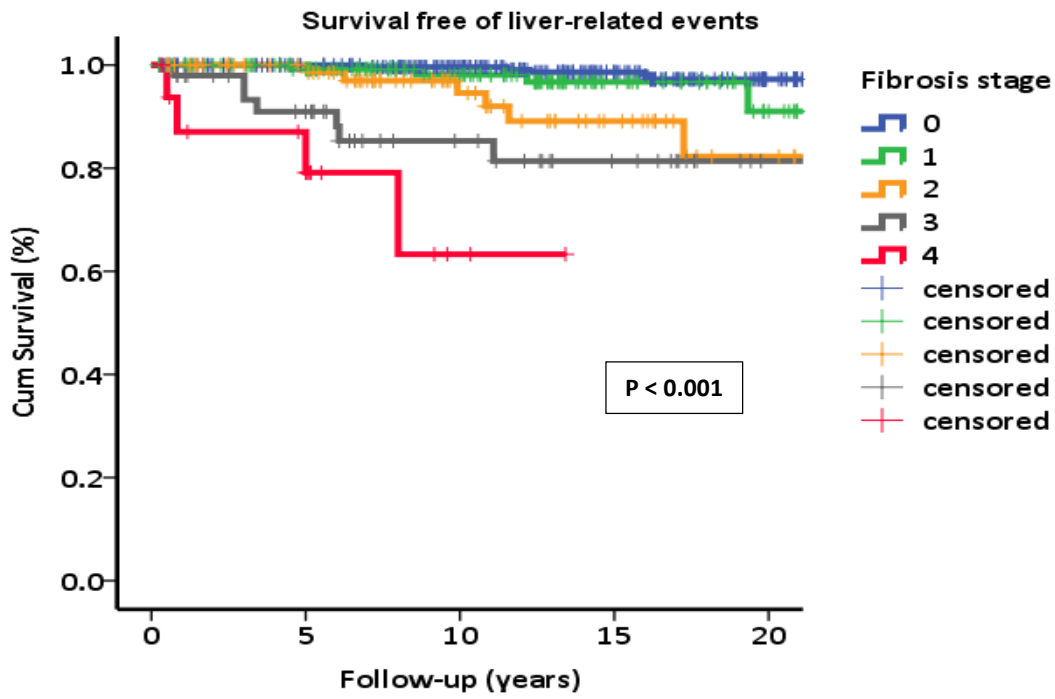

|         |     |     |     |     |    |
|---------|-----|-----|-----|-----|----|
| Stage 0 | 321 | 276 | 228 | 157 | 84 |
| Stage 1 | 141 | 120 | 85  | 37  | 12 |
| Stage 2 | 85  | 69  | 39  | 22  | 8  |
| Stage 3 | 51  | 38  | 23  | 14  | 3  |
| Stage 4 | 17  | 11  | 2   | 0   | 0  |
